# Supplementary material for: Immune Suppressive Effects of Plasma-Derived Exosome Populations in Head and Neck Cancer
Source: PubMed Central journal article supplement (PMC7409343; doi:10.3390/cancers12071997), 2020-07-21
Supplement: cancers-12-01997-s001.pdf [file cancers-12-01997-s001.pdf]

# Supplementary Data

Ab: TSG

101  
Total

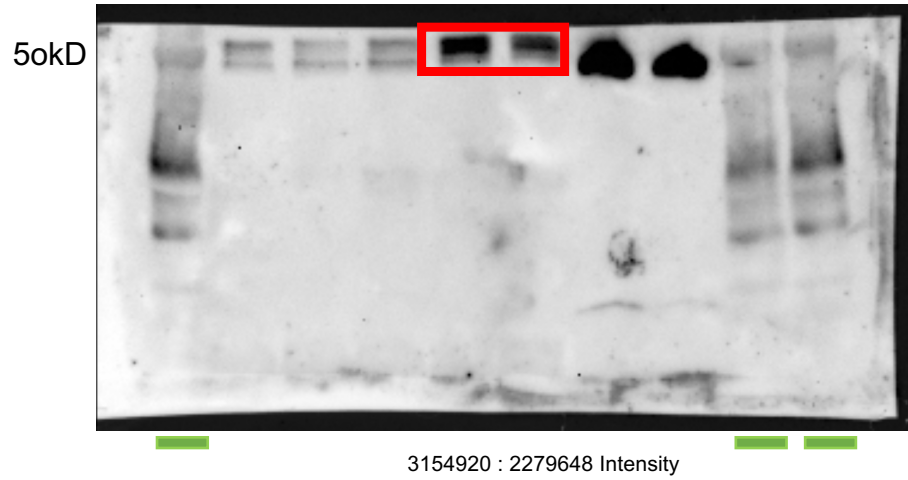

Ab: CD45

Total

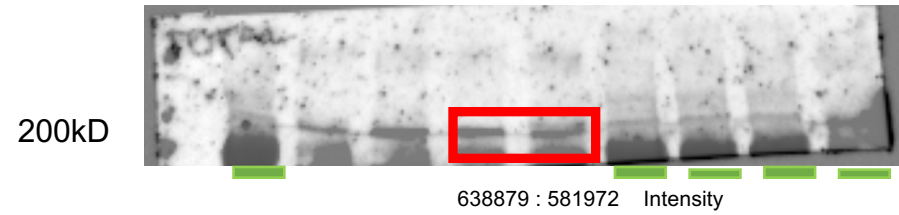

Ab: EpCAM

Total

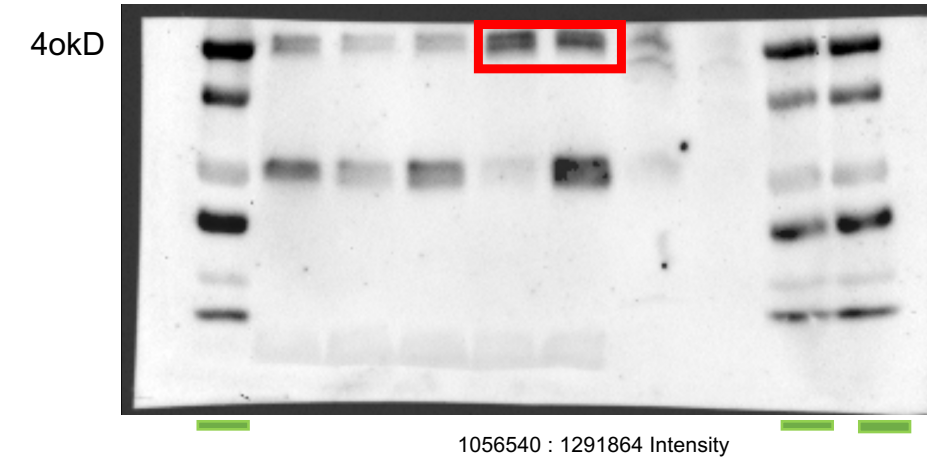

CD45(-)

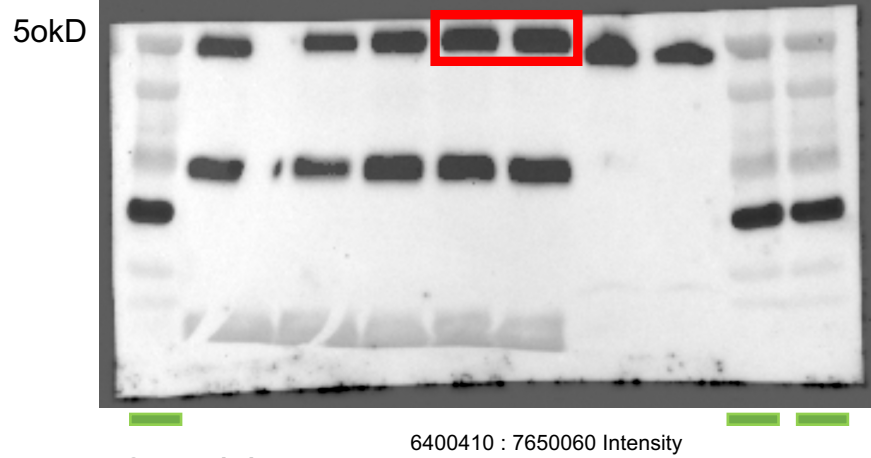

CD45(-)

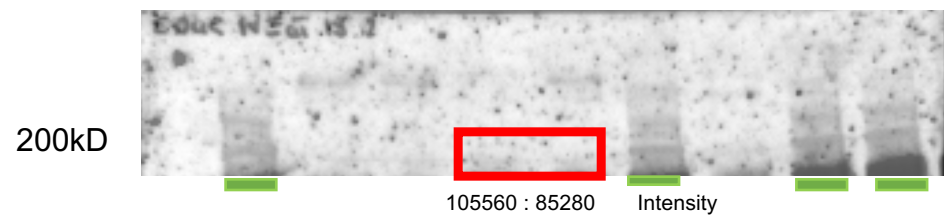

CD45(-)

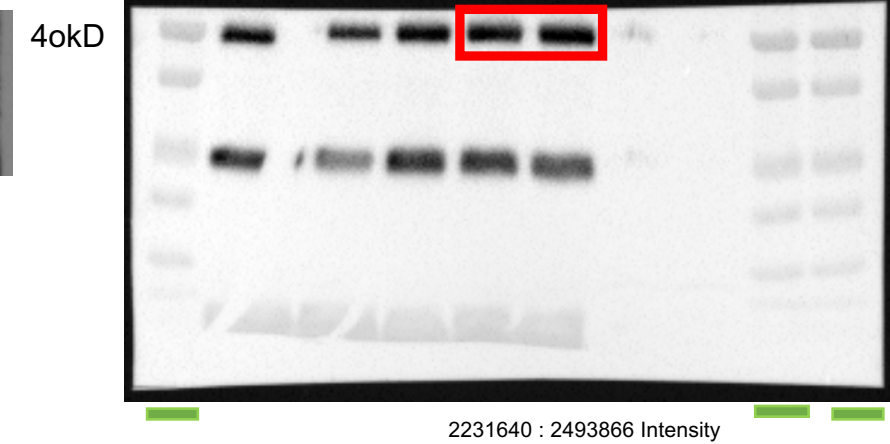

CD45(+)

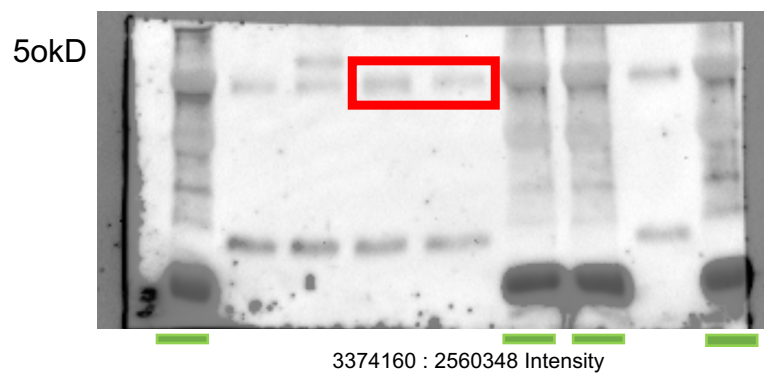

CD45(+)

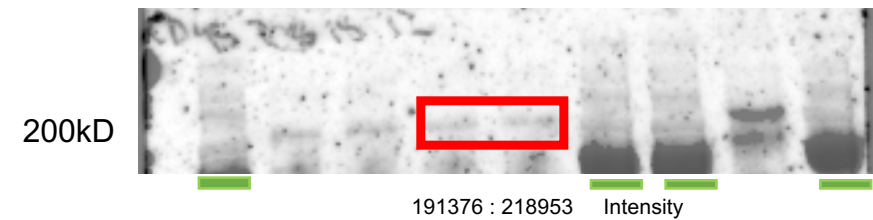

CD45(+)

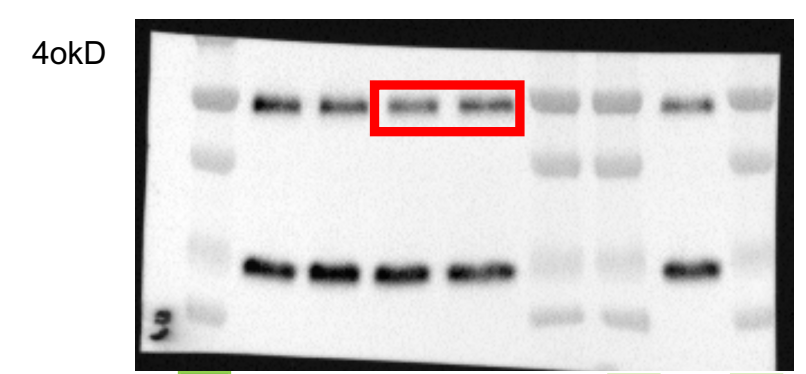

 =WB displayed in Fig.1  
 =Ladder
